# Supplementary material
Source: MDPI journal article supplement (https://www.mdpi.com/2038-8330/16/1/8)
Supplement: s1 [file s1]

## Article

# Predictive model for occurrence of febrile neutropenia after chemotherapy in patients with diffuse large B-cell lymphoma: a multicenter, retrospective, observational study

## Supplementary Material

Table S1. Univariate analysis of factors associated with febrile neutropenia incidence during any cycle for patients treated with the R-CHOP-like regimen.

|                                         | Developed FN<br>during any cycle<br><i>n</i> = 64 | Did not develop FN<br>during any cycle<br><i>n</i> = 130 | p-value |
|-----------------------------------------|---------------------------------------------------|----------------------------------------------------------|---------|
| Age ≥ 65 years                          | 47 (73%)                                          | 91 (70%)                                                 | 0.62    |
| Sex: male                               | 38 (59%)                                          | 71 (55%)                                                 | 0.53    |
| Comorbidity                             |                                                   |                                                          |         |
| Diabetes                                | 10 (16%)                                          | 22 (17%)                                                 | 0.82    |
| Chronic kidney disease                  | 5 (8%)                                            | 5 (4%)                                                   | 0.24    |
| Cardiac disease                         | 12 (19%)                                          | 21 (16%)                                                 | 0.65    |
| Pulmonary disease                       | 2 (3%)                                            | 2 (2%)                                                   | 0.46    |
| Malignancy                              | 8 (12%)                                           | 16 (12%)                                                 | 0.97    |
| Baseline laboratory data                |                                                   |                                                          |         |
| WBC < 3.5 × 10 <sup>9</sup> /L          | 7 (11%)                                           | 15 (12%)                                                 | 0.9     |
| Hemoglobin < 12.0 g/dL                  | 33 (52%)                                          | 59 (45%)                                                 | 0.42    |
| Platelet < 100 × 10 <sup>9</sup> /L     | 14 (22%)                                          | 10 (8%)                                                  | 0.005   |
| ANC < 1.5 × 10 <sup>9</sup> /L          | 2 (3%)                                            | 6 (5%)                                                   | 0.62    |
| ALC < 0.7 × 10 <sup>9</sup> /L          | 24 (38%)                                          | 18 (14%)                                                 | < 0.001 |
| T-Bil > 1.0 g/dL                        | 9 (14%)                                           | 18 (15%)                                                 | 0.92    |
| Albumin < 3.5 g/dL                      | 36 (58%)                                          | 35 (27%)                                                 | < 0.001 |
| LD > 222 IU/L                           | 43 (68%)                                          | 66 (51%)                                                 | 0.025   |
| CRP > 10 mg/dL                          | 5 (8%)                                            | 5 (4%)                                                   | 0.29    |
| eGFR < 60<br>mL/min/1.73 m <sup>2</sup> | 22 (34%)                                          | 30 (23%)                                                 | 0.095   |
| sIL2R > 2000 U/mL                       | 37 (58%)                                          | 35 (27%)                                                 | < 0.001 |
| Ann Arbor stage:<br>Advanced (III–IV)   | 49 (78%)                                          | 59 (45%)                                                 | < 0.001 |
| Extranodal involvement                  | 41 (64%)                                          | 61 (47%)                                                 | 0.025   |
| Bone marrow infiltration                | 16 (25%)                                          | 14 (11%)                                                 | 0.01    |
| Viral hepatitis status                  |                                                   |                                                          |         |

|                          |          |          |       |
|--------------------------|----------|----------|-------|
| Positive hepatitis panel | 18 (28%) | 22 (17%) | 0.07  |
| HCV                      | 9 (14%)  | 4 (3%)   | 0.004 |
| HBV                      | 13 (20%) | 20 (15%) | 0.39  |
| HBsAg +                  | 1 (2%)   | 2 (2%)   | 0.99  |
| anti-HBs +               | 7 (11%)  | 14 (11%) | 0.97  |
| anti-HBc +               | 13 (20%) | 15 (12%) | 0.1   |

Abbreviations:

ALC, absolute lymphocyte count; ANC, absolute neutrophil count; anti-HBc, hepatitis B core antibody; anti-HBs, hepatitis B surface antibody; CRP, C-reactive protein; eGFR, estimated glomerular filtration rate; FN, febrile neutropenia; HBsAg, hepatitis B surface antigen; HBV, hepatitis B virus; HCV, hepatitis C virus; LD, lactate dehydrogenase; R-CHOP, cyclophosphamide, doxorubicin, vincristine, and prednisone with added rituximab; sIL2R, soluble interleukin-2 receptor; T-Bil, total bilirubin; WBC, white blood cell.

Table S2. Univariate analysis of factors associated with febrile neutropenia incidence during the first cycle among patients in the salvage therapy group.

|                                         | Developed FN<br>during the first therapy<br>cycle<br><i>n</i> = 9 | Did not develop FN<br>during the first therapy cycle<br><i>n</i> = 43 | p-value |
|-----------------------------------------|-------------------------------------------------------------------|-----------------------------------------------------------------------|---------|
| Age ≥ 65 years                          | 7 (78%)                                                           | 29 (67%)                                                              | 0.54    |
| Sex: male                               | 8 (89%)                                                           | 29 (67%)                                                              | 0.2     |
| Comorbidity                             |                                                                   |                                                                       |         |
| Diabetes                                | 1 (11%)                                                           | 3 (7%)                                                                | 0.67    |
| Chronic kidney disease                  | 0 (0%)                                                            | 4 (9%)                                                                | 0.34    |
| Cardiac disease                         | 1 (11%)                                                           | 4 (9%)                                                                | 0.87    |
| Pulmonary disease                       | 0 (0%)                                                            | 1 (2%)                                                                | 0.64    |
| Malignancy                              | 2 (22%)                                                           | 5 (12%)                                                               | 0.4     |
| Baseline laboratory data                |                                                                   |                                                                       |         |
| WBC < 3.5 × 10 <sup>9</sup> /L          | 1 (11%)                                                           | 6 (14%)                                                               | 0.82    |
| Hemoglobin < 12.0 g/dL                  | 3 (33%)                                                           | 19 (44%)                                                              | 0.55    |
| Platelet < 100 × 10 <sup>9</sup> /L     | 2 (22%)                                                           | 6 (14%)                                                               | 0.53    |
| ANC < 1.5 × 10 <sup>9</sup> /L          | 1 (11%)                                                           | 0 (0%)                                                                | 0.027   |
| ALC < 0.7 × 10 <sup>9</sup> /L          | 3 (33%)                                                           | 9 (21%)                                                               | 0.42    |
| T-Bil > 1.0 g/dL                        | 0 (0%)                                                            | 8 (20%)                                                               | 0.17    |
| Albumin < 3.5 g/dL                      | 6 (67%)                                                           | 10 (24%)                                                              | 0.012   |
| LD > 222 IU/L                           | 7 (78%)                                                           | 31 (72%)                                                              | 0.73    |
| CRP > 10 mg/dL                          | 1 (12%)                                                           | 2 (5%)                                                                | 0.41    |
| eGFR < 60<br>mL/min/1.73 m <sup>2</sup> | 2 (22%)                                                           | 7 (16%)                                                               | 0.67    |
| sIL2R > 2000 U/mL                       | 7 (78%)                                                           | 18 (42%)                                                              | 0.05    |
| Ann Arbor stage:<br>Advanced (III–IV)   | 9 (100%)                                                          | 35 (81%)                                                              | 0.16    |
| Extranodal involvement                  | 8 (89%)                                                           | 30 (70%)                                                              | 0.24    |

|                          |         |          |       |
|--------------------------|---------|----------|-------|
| Bone marrow infiltration | 2 (22%) | 12 (28%) | 0.73  |
| Viral hepatitis status   |         |          |       |
| Positive hepatitis panel | 4 (44%) | 6 (14%)  | 0.035 |
| HCV                      | 4 (44%) | 6 (14%)  | 0.035 |
| HBV                      | 1 (11%) | 1 (2%)   | 0.21  |
| HBsAg +                  | 0 (0%)  | 2 (5%)   | 0.51  |
| anti-HBs +               | 2 (22%) | 4 (9%)   | 0.27  |
| anti-HBc +               | 3 (33%) | 3 (7%)   | 0.024 |

Abbreviations:

ALC, absolute lymphocyte count; ANC, absolute neutrophil count; anti-HBc, hepatitis B core antibody; anti-HBs, hepatitis B surface antibody; CRP, C-reactive protein; eGFR, estimated glomerular filtration rate; FN, febrile neutropenia; HBsAg, hepatitis B surface antigen; HBV, hepatitis B virus; HCV, hepatitis C virus; LD, lactate dehydrogenase; sIL2R, soluble interleukin-2 receptor; T-Bil, total bilirubin; WBC, white blood cell.

Table S3. Univariate analysis of factors associated with febrile neutropenia incidence during any cycle among patients in the salvage therapy group.

|                                         | Developed FN<br>during any cycle<br><i>n</i> = 36 | Did not develop FN<br>during any cycle<br><i>n</i> = 16 | p-value |
|-----------------------------------------|---------------------------------------------------|---------------------------------------------------------|---------|
| Age ≥ 65 years                          | 25 (69%)                                          | 11 (69%)                                                | 0.96    |
| Sex: male                               | 27 (75%)                                          | 10 (62%)                                                | 0.36    |
| Comorbidity                             |                                                   |                                                         |         |
| Diabetes                                | 2 (6%)                                            | 2 (12%)                                                 | 0.39    |
| Chronic kidney disease                  | 4 (11%)                                           | 0 (0%)                                                  | 0.17    |
| Cardiac disease                         | 4 (11%)                                           | 1 (6%)                                                  | 0.58    |
| Pulmonary disease                       | 0 (0%)                                            | 1 (6%)                                                  | 0.13    |
| Malignancy                              | 5 (14%)                                           | 2 (12%)                                                 | 0.89    |
| Baseline laboratory data                |                                                   |                                                         |         |
| WBC < 3.5 × 10 <sup>9</sup> /L          | 7 (19%)                                           | 0 (0%)                                                  | 0.058   |
| Hemoglobin < 12.0 g/dL                  | 16 (44%)                                          | 6 (38%)                                                 | 0.64    |
| Platelet < 100 × 10 <sup>9</sup> /L     | 7 (19%)                                           | 1 (6%)                                                  | 0.22    |
| ANC < 1.5 × 10 <sup>9</sup> /L          | 1 (3%)                                            | 0 (0%)                                                  | 0.5     |
| ALC < 0.7 × 10 <sup>9</sup> /L          | 11 (31%)                                          | 1 (6%)                                                  | 0.055   |
| T-Bil > 1.0 g/dL                        | 6 (18%)                                           | 2 (12%)                                                 | 0.61    |
| Albumin < 3.5 g/dL                      | 12 (34%)                                          | 4 (25%)                                                 | 0.51    |
| LD > 222 IU/L                           | 27 (75%)                                          | 11 (69%)                                                | 0.64    |
| CRP > 10 mg/dL                          | 3 (9%)                                            | 0 (0%)                                                  | 0.24    |
| eGFR < 60<br>mL/min/1.73 m <sup>2</sup> | 7 (19%)                                           | 2 (12%)                                                 | 0.54    |
| sIL2R > 2000 IU/L                       | 21 (58%)                                          | 4 (25%)                                                 | 0.026   |
| Ann Arbor stage:<br>Advanced (III–IV)   | 30 (83%)                                          | 14 (88%)                                                | 0.7     |
| Extranodal involvement                  | 26 (72%)                                          | 12 (75%)                                                | 0.83    |
| Bone marrow infiltration                | 11 (31%)                                          | 3 (19%)                                                 | 0.38    |

## Viral hepatitis status

|                          |         |         |       |
|--------------------------|---------|---------|-------|
| Positive hepatitis panel | 7 (19%) | 3 (19%) | 0.95  |
| HCV                      | 7 (19%) | 3 (19%) | 0.95  |
| HBV                      | 2 (6%)  | 0 (0%)  | 0.34  |
| HBsAg +                  | 0 (0%)  | 2 (12%) | 0.031 |
| anti-HBs +               | 5 (14%) | 1 (6%)  | 0.43  |
| anti-HBc +               | 5 (14%) | 1 (6%)  | 0.43  |

## Abbreviations:

ALC, absolute lymphocyte count; ANC, absolute neutrophil count; anti-HBc, hepatitis B core antibody; anti-HBs, hepatitis B surface antibody; CRP, C-reactive protein; eGFR, estimated glomerular filtration rate; FN, febrile neutropenia; HBsAg, hepatitis B surface antigen; HBV, hepatitis B virus; HCV, hepatitis C virus; LD, lactate dehydrogenase; sIL2R, soluble interleukin-2 receptor; T-Bil, total bilirubin; WBC, white blood cell.

Table S4. Multivariate logistic regression analysis of risk factors associated with febrile neutropenia incidence during any cycle among patients treated with the R-CHOP-like regimen.

|                                       |                     |                              |       | <i>n</i> = 191 |
|---------------------------------------|---------------------|------------------------------|-------|----------------|
|                                       | Odds ratio [95% CI] | $\beta$ coefficient [95% CI] | Score | p-value        |
| ALC < $0.7 \times 10^9$ /L            | 2.61 [1.18–5.75]    | 0.96 [0.17–1.75]             | 1     | 0.018          |
| Alb < 3.5 g/dL                        | 2.33 [1.16–4.67]    | 0.85 [0.15–1.54]             | 1     | 0.017          |
| Ann Arbor stage:<br>Advanced (III–IV) | 3.32 [1.60–6.89]    | 1.20 [0.47–1.93]             | 1     | 0.001          |

Abbreviation: Alb, albumin; ALC, absolute lymphocyte count; CI, confidence interval; R-CHOP, cyclophosphamide, doxorubicin, vincristine, and prednisone with added rituximab.

Table S5. Bootstrap validation of the predictive model for febrile neutropenia occurrence during any cycle among patients treated with the R-CHOP-like regimen and comparison with the original model.

|                                       |                                                     |                                              | <i>n</i> = 191 |
|---------------------------------------|-----------------------------------------------------|----------------------------------------------|----------------|
|                                       | Logistic regression<br>$\beta$ coefficient [95% CI] | Bootstrapped<br>$\beta$ coefficient [95% CI] | Score          |
| ALC < $0.7 \times 10^9$ /L            | 0.96 [0.17–1.75]                                    | 0.98 [0.12–1.79]                             | 1              |
| Alb < 3.5 g/dL                        | 0.85 [0.15–1.54]                                    | 0.88 [0.15–1.54]                             | 1              |
| Ann Arbor stage:<br>Advanced (III–IV) | 1.20 [0.47–1.93]                                    | 1.21 [0.44–1.97]                             | 1              |

Abbreviation: Alb, albumin; ALC, absolute lymphocyte count; CI, confidence interval; R-CHOP, cyclophosphamide, doxorubicin, vincristine, and prednisone with added rituximab.

Table S6. Multivariate logistic regression of risk factors associated with febrile neutropenia incidence during the first cycle of chemotherapy among patients treated with the R-CHOP-like regimen, with a more detailed evaluation of the viral hepatitis status.

|  |  |  | <i>n</i> = 191 |
|--|--|--|----------------|
|--|--|--|----------------|

|                            | Odds ratio [95% CI] | $\beta$ coefficient [95% CI] | p-value  |
|----------------------------|---------------------|------------------------------|----------|
| ALC $< 0.7 \times 10^9$ /L | 6.04 [2.39–15.23]   | 1.80 [0.87–2.72]             | $<0.001$ |
| sIL2R $> 2000$ U/mL        | 3.03 [1.19–7.70]    | 1.11 [0.17–2.04]             | 0.020    |
| Extranodal involvement     | 3.05 [1.08–8.57]    | 1.11 [0.08–2.15]             | 0.035    |
| HCV                        | 5.26 [1.28–21.69]   | 1.66 [0.24–3.08]             | 0.022    |
| anti-HBc +                 | 3.11 [1.00–9.68]    | 1.13 [-0.001–2.27]           | 0.050    |

Abbreviations: ALC, absolute lymphocyte count; anti-HBc, hepatitis B core antibody; HCV, hepatitis C virus; CI, confidence interval; R-CHOP, cyclophosphamide, doxorubicin, vincristine, and prednisone with added rituximab; sIL2R, soluble interleukin-2 receptor.

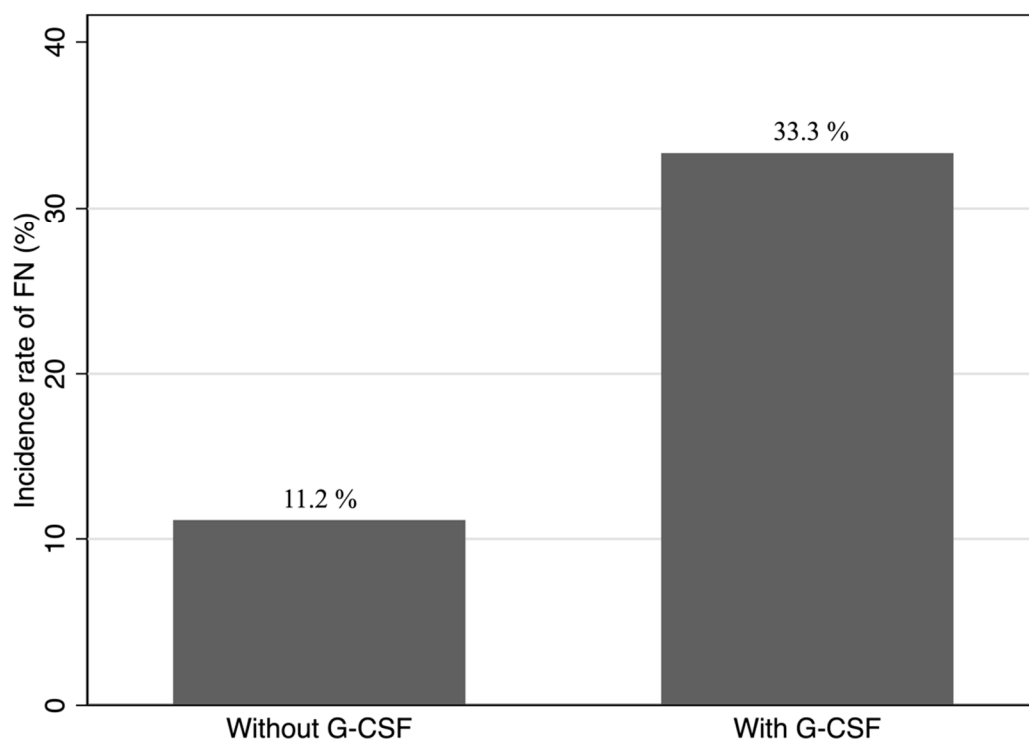

Figure S1. Differences in FN incidence between patients who received G-CSF during the first cycle of R-CHOP-like therapy and those who did not. Abbreviations: FN, febrile neutropenia; G-CSF, granulocyte colony-stimulating factor; R-CHOP, cyclophosphamide, doxorubicin, vincristine, and prednisone with added rituximab.

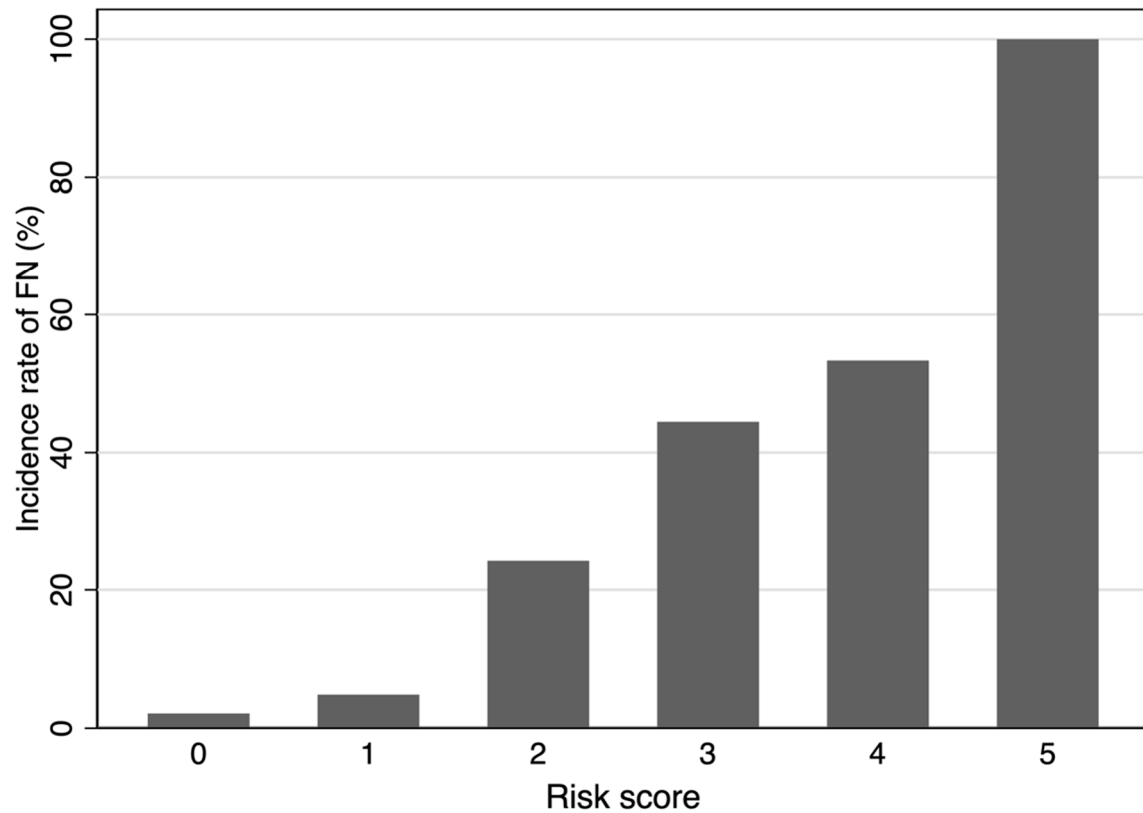

Figure S2. Incidence rate of FN during the first cycle of chemotherapy for patients treated with the R-CHOP-like regimen based on each prediction score. Abbreviations: FN, febrile neutropenia; R-CHOP, cyclophosphamide, doxorubicin, vincristine, and prednisone with added rituximab.
